# Supplementary material for: Occurrence of Capnophilic Lactic Fermentation in the Hyperthermophilic Anaerobic Bacterium Thermotoga sp. Strain RQ7
Source: MDPI journal article supplement (doi:10.3390/ijms231912049), 2022-10-10
Supplement: s1 [file s1]

# Supplementary Materials

## Assessment of Capnophilic Lactic Fermentation (CLF) pathway in thermophilic anaerobic bacteria *Thermotoga neapolitana*, *Thermotoga maritima* and RQ7

Nunzia Esercizio<sup>1</sup>, Mariamichela Lanzilli<sup>1</sup>, Simone Landi<sup>1,2</sup>, Lucio Caso<sup>1</sup>, Zhaohui Xu<sup>3</sup>, Genoveffa Nuzzo<sup>1</sup>, Carmela Gallo<sup>1</sup>, Emiliano Manzo<sup>1</sup>, Sergio Esposito<sup>2</sup>, Angelo Fontana<sup>1,2</sup> and Giuliana d'Ippolito<sup>1,\*</sup>

<sup>1</sup> Institute of Biomolecular Chemistry (ICB), CNR, Via Campi Flegrei 34, 80078 Pozzuoli (Napoli), Italy

<sup>2</sup> Department of Biology, University of Naples "Federico II", Via Cinthia, I-80126 Napoli, Italy

<sup>3</sup> Department of Biological Sciences, Bowling Green State University, Bowling Green, OH 43403, USA

\* Correspondence: gdippolito@icb.cnr.it , +39 0818675096

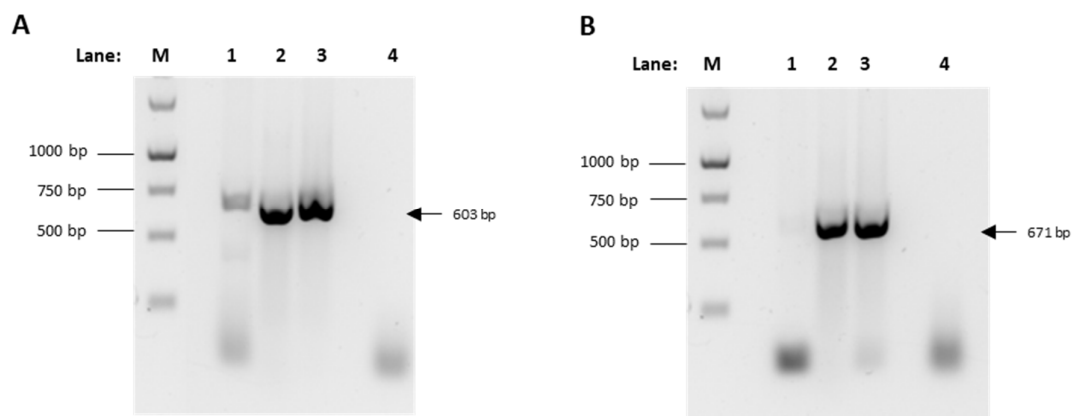

**Figure S1:** PCR results for the presence of F-type (A) and V-type (B) ATPases on the genomic DNA of *T.nea*, *T.mar* and *T.rq7*. In sequence: M, marker 1Kb; Lane 1, *T.maritima*; Lane 2, *T.neapolitana*; Lane 3, *T.rq7*; Lane 4, negative control. Fragments of 603 bp and 671 bp respectively are expected.

**Table S1:** Bioinformatic analysis of V-ATPases in *Thermotogacea* family. For each subunit, species and percentage of identity in relation to *T.nea* are indicated.

| V-ATPase subunit in <i>T.nea</i> | <i>Trq7</i> | % ID | <i>P.hyp</i>           | %ID          |
|----------------------------------|-------------|------|------------------------|--------------|
| subunit A-atpA                   | TRQ7_06035  | 100  | AJ81_03190             | 46.37        |
| subunit B-atpB                   | TRQ7_06040  | 100  | AJ81_03195             | 51.92        |
| subunit D-atpD                   | TRQ7_06045  | 100  | AJ81_03200             | 31.01        |
| subunit E-atpE                   | TRQ7_06030  | 99.8 | AJ81_03175             | 27.51        |
| subunit F-atpF                   | TRQ7_06020  | 100  | AJ81_03165/ AJ81_03170 | 23.26/ 23.49 |
| subunit G-atpG                   | TRQ7_06025  | 100  | AJ81_03165/ AJ81_03170 | 26.79/ 23.05 |

**Table S2:** Bioinformatic analysis of F-ATPases in *Thermotogacea* family. For each subunit, species and percentage of identity in relation to *T.nea* are indicated.

| <i>T.nea</i> subunits | <i>Tmar</i> | % ID  | <i>Trq7</i> | %ID   | <i>Tnap</i> | %ID   | <i>Tpet</i> | %ID   | <i>P.lett</i> | %ID   | <i>P.ther</i>      |
|-----------------------|-------------|-------|-------------|-------|-------------|-------|-------------|-------|---------------|-------|--------------------|
| subunit A-atpB        | TM_1616     | 76.52 | TRQ7_05640  | 100   | Tnap_1191   | 75.44 | Tpet_1175   | 76.39 | Tlet_0160     | 51.4  | Theth_0            |
| subunit B-atpF        | TM_1614     | 75.75 | TRQ7_05650  | 91.92 | Tnap_1193   | 76.97 | Tpet_1177   | 75.75 | Tlet_0162     | 43.96 | Theth_0            |
| subunit C-atpE        | TM_1615     | 86.43 | TRQ7_05645  | 98.83 | Tnap_1192   | 86.04 | Tpet_1176   | 86.43 | Tlet_0161     | 50.19 | Theth_0<br>Theth_0 |
| subunit Delta-atpH    | TM_1613     | 71.37 | TRQ7_05655  | 99.82 | Tnap_1194   | 69.38 | Tpet_1178   | 71.37 | Tlet_0163     | 39.89 | Theth_0            |
| subunit Epsilon-atpC  | TM_1609     | 77.47 | TRQ7_05675  | 98.15 | Tnap_1198   | 77.47 | Tpet_1182   | 77.47 | Tlet_0167     | 33.02 | Theth_0            |
| subunit Gamma-atpG    | TM_1611     | 76.27 | TRQ7_05665  | 100   | Tnap_1196   | 75.79 | Tpet_1180   | 76.58 | Tlet_0165     | 42.68 | Theth_0            |
| subunit Alpha-atpA    | TM_1612     | 82.87 | TRQ7_05660  | 99.88 | Tnap_1195   | 82.87 | Tpet_1179   | 82.93 | Tlet_0164     | 64.02 | Theth_0            |
| subunit I-atpI        | -           | -     | TRQ7_05635  | 100   | -           | -     | -           | -     | -             | -     | -                  |
| subunit Beta- atpD    | TM_1610     | 81.31 | TRQ7_05670  | 97.87 | Tnap_1197   | 81.31 | Tpet_1181   | 81.31 | Tlet_0166     | 67.23 | Theth_0            |

**Table S3:** List of primers used for PCR and Real-time PCR analysis on *T.nea*, *T.mar* and *T.rq7*.

| Primer       | Sequence             | Description                                        |
|--------------|----------------------|----------------------------------------------------|
| PCR-VATPa Fw | AGAGTAAGGGGAGGAGACGT | alfa subunit of V-type ATPase<br>for classic PCR   |
| PCR-VATPa Rv | ACGGGCATTTCTTCCAGTCT |                                                    |
| PCR-FATPb Fw | GACAGATGAACGAACCACCG | beta subunit of F-type ATPase<br>for classic PCR   |
| PCR-FATPb Rv | CAACGTGGAAAGGCTGACTC |                                                    |
| RT-VATPa Fw  | AGATGGGCAGAGGCATTGAG | alfa subunit of V-type ATPase<br>for real time PCR |
| RT-VATPa Rv  | ACTGAGCGATTCTGGTAGCG |                                                    |
| RT-VATPb Fw  | AGTGCGTTCTATCGCTTCCA | beta subunit of V-type ATPase<br>for real time PCR |
| RT-VATPb Rv  | AAGGTGCTCGAATTCTTCGC |                                                    |
| RT-FATPb Fw  | AACCACCTTCGCTCACCTG  | beta subunit of F-type ATPase<br>for real time PCR |
| RT-FATPb Rv  | TCGAAGAAGAATCGAGCGGG |                                                    |
